# Supplementary material
Source: PubMed Central journal article supplement (PMC3347095)
Supplement: supp_50.5.1773_JCM-JCM06421-11-s01.pdf [file supp_50.5.1773_JCM-JCM06421-11-s01.pdf]

**Supplementary Material.**

**Table 1. The PVL encoding phages and the amount of PVL detected in culture supernatants of isolates of different lineages of PVL-MRSA.**

---

\*: *SCCmec V (5C2&5)*, <sup>a</sup>: *SCCmec V (5C2)*. <sup>b</sup>: *SCCmec IV Non-typeable*.

Disease Presentations: Community-Associated Pneumonia (CAP), Bacteraemia (BACT), Skin and Soft Tissue Infection (SSTI), Upper Respiratory Tract Infection (URTI), Asymptomatic (AS), Not Known (NK). <sup>F</sup>: Fatal, five of the patients with PVL-MRSA infection subsequently died (3.5%; four with community-associated pneumonia (CC22 n=2, CC80 n=2) and one with bacteraemia (CC22)). Sex: Female (F), Male (M). NK: Not known or not available. GR: Geographic Region- Nine regions of England designated by the Health Protection Agency, including Wales (defined as a 10<sup>th</sup> region for the purposes of this study).

---

| MLST Lineage (n) | MLST Sequence type | spa-type                                                                 | PVL Phage (Φ)                                   | a | SCCmec (n)                                                         | Disease (n)                                                                                   | GR (n) | Sex (n)                    | Age Range (Yrs) |       |       |     |    | PVL µg/ml     | Range | Mean PVL (µg/ml) | Mean SD / isolate | Mean SD / Lineage |
|------------------|--------------------|--------------------------------------------------------------------------|-------------------------------------------------|---|--------------------------------------------------------------------|-----------------------------------------------------------------------------------------------|--------|----------------------------|-----------------|-------|-------|-----|----|---------------|-------|------------------|-------------------|-------------------|
|                  |                    |                                                                          |                                                 |   |                                                                    |                                                                                               |        |                            | 0-16            | 17-40 | 41-60 | 60+ | NK |               |       |                  |                   |                   |
| CC1 (11)         | ST1                | t127 (7)                                                                 | Sa2USA (7)                                      | 3 | IVa (9)                                                            | SSTI (8)                                                                                      | 3      | F (2)                      | 4               | 4     | -     | -   | 3  | 0.117 – 0.954 | 0.55  | 0.110            | 0.220             |                   |
|                  | ST772              | t128 (3)<br>t657 (1)                                                     | Sa2MW (3)<br>Unknown (1)                        |   | IVc (1)<br>V* (1)                                                  | AS (3)                                                                                        |        | M (7)<br>NK (2)            |                 |       |       |     |    |               |       |                  |                   |                   |
| CC5 (9)          | ST5                | t002 (9)                                                                 | Sa2USA (7)<br>Unknown (1)<br>Icosahedral (1)    | 2 | IVc (7)<br>IVh (1)<br>IVNT (1)                                     | SSTI (9)                                                                                      | 7      | F (5)<br>M (4)             | 2               | 5     | 2     | -   | -  | 0.209 – 0.489 | 0.326 | 0.140            | 0.100             |                   |
| CC8 (17)         | ST8                | t008 (14)<br>t4069 (2)<br>t024 (1)                                       | Sa2USA (17)                                     | 1 | IVa (16)<br>IVb (1)                                                | AS (3)<br>CAP (1)<br>SSTI (12)<br>NK (1)                                                      | 9      | F (5)<br>M (12)            | 7               | 5     | 4     | 1   | -  | 0.072 – 4.865 | 1.198 | 0.184            | 1.052             |                   |
| CC22 (48)        | ST22               | t005 (34)<br>t852 (9)<br>t1790 (2)<br>t1516 (1)<br>t2816 (1)<br>t849 (1) | PVL (34)<br>108PVL (8)<br>Icosahedral (6)       | 1 | IVc (43)<br>IVd (3)<br>IVNT <sup>b</sup> (1)<br>V <sup>a</sup> (1) | AS (20)<br>BACT (1) <sup>F</sup><br>NA (5)<br>CAP (2) <sup>F,F</sup><br>SSTI (16)<br>URTI (4) | 9      | F (21)<br>M (25)<br>NK (2) | 25              | 8     | 12    | 2   | 1  | 0.038 – 0.881 | 0.359 | 0.097            | 0.167             |                   |
| CC30 (9)         | ST30               | t019 (6)<br>t318 (2)<br>t012 (1)                                         | Icosahedral (5)<br>Elongated (3)<br>Unknown (1) | 3 | IVa (3)<br>IVc (5)<br>IVd (1)                                      | AS (1)<br>SSTI (8)                                                                            | 7      | F (3)<br>M (6)             | 2               | 4     | 2     | 1   |    | 0.074 – 1.080 | 0.634 | 0.193            | 0.318             |                   |
| CC59 (3)         | ST59               | t437 (3)                                                                 | Sa2958like (2)<br>Unknown (1)                   | 1 | V* (3)                                                             | SSTI (2)<br>NA (1)                                                                            | 2      | F (1)<br>M (2)             | 1               | 2     | -     | -   |    | 0.324 – 0.560 | 0.438 | 0.157            | 0.118             |                   |
| CC80 (27)        | ST80               | t044 (24)<br>t131 (1)<br>t1759 (1)<br>t2891 (1)                          | Sa2MW (27)                                      | 3 | IVc (27)                                                           | AS (5)<br>BACT (1)<br>CAP (8) <sup>F,F</sup><br>SSTI (13)                                     | 10     | F (12)<br>M (14)<br>NA (1) | 3               | 10    | 5     | 7   | 2  | 0.020 – 0.955 | 0.239 | 0.062            | 0.241             |                   |
| CC88 (5)         | ST88               | t690 (2)<br>t448 (2)<br>t186 (1)                                         | Elongated (5)                                   | 3 | IVa (5)                                                            | AS (1)<br>SSTI (4)                                                                            | 4      | F (3)<br>M (2)             | 2               | 1     | -     | -   | 2  | 0.144 – 0.296 | 0.190 | 0.110            | 0.061             |                   |
| ST93 (13)        | ST93               | t202 (12)<br>t3949 (1)                                                   | Sa2USA (13)                                     | 3 | IVa (13)                                                           | CAP (1)<br>SSTI (12)                                                                          | 6      | F (5)<br>M (8)             | 4               | 7     | 2     | -   | -  | 0.582 – 1.992 | 0.926 | 0.206            | 0.357             |                   |

**Table 2. Pearson's Chi Squared test for variation examining the affects of age, sex and geographic region on disease presentation.**

---

Significance was set at  $p < 0.05$ . None of the variables had a significant affect.

---

| <b>Variables Tested by Pearson's Chi Squared Test</b> | <b>P-value</b> |
|-------------------------------------------------------|----------------|
| Age on disease presentation                           | 0.08833        |
| Sex on disease presentation                           | 0.8996         |
| Geographic region on disease presentation             | 0.1324         |

---

**Table 3. Coefficients for the Generalised Linear Model (GLM) examining the effect of MLST clonal complex on PVL production.**

The intercept was set as CC8 as this was the highest PVL-producing lineage.

Significance was set at  $p < 0.05$ . Std. Error: Standard Error.

---

**Coefficients:**

|             | <b>Estimate</b> | <b>Std. Error</b> | <b>t value</b> | <b>Pr(&gt; t )</b> | <b>Significance</b> |
|-------------|-----------------|-------------------|----------------|--------------------|---------------------|
| (Intercept) | 4.4303          | 0.1870            | 23.693         | <2e-16             | <0.001              |
| CC1         | -0.5319         | 0.2983            | -1.783         | 0.076857           | 0.1                 |
| CC5         | -0.9851         | 0.3178            | -3.100         | 0.002366           | <0.001              |
| CC22        | -0.9868         | 0.2176            | -4.535         | 1.27e-05           | <0.001              |
| CC30        | -0.4891         | 0.3178            | -1.539         | 0.126189           | 1                   |
| CC59        | -0.6756         | 0.4828            | -1.399         | 0.164027           | 1                   |
| CC80        | -1.8048         | 0.2387            | -7.561         | 5.85e-12           | <0.001              |
| CC88        | -1.5220         | 0.3922            | -3.880         | 0.000163           | <0.001              |
| ST93        | 0.0472          | 0.2841            | 0.166          | 0.868286           | 1                   |

(Dispersion parameter for gaussian family taken to be 0.2589196)

Residual standard error: 0.5088 on 133 degrees of freedom

Multiple R-squared: 0.447, Adjusted R-squared: 0.4137

F-statistic: 13.44 on 8 and 133 DF, p-value: 3.936e-14

---
